# Supplementary material for: Insights from the draft genome into the pathogenicity of a clinical isolate of Elizabethkingia meningoseptica Em3
Source: PubMed Central journal article supplement (PMC5602931; doi:10.1186/s40793-017-0269-8), 2017-09-16
Supplement: 40793_2017_269_MOESM1_ESM.pdf [file 40793_2017_269_MOESM1_ESM.pdf]

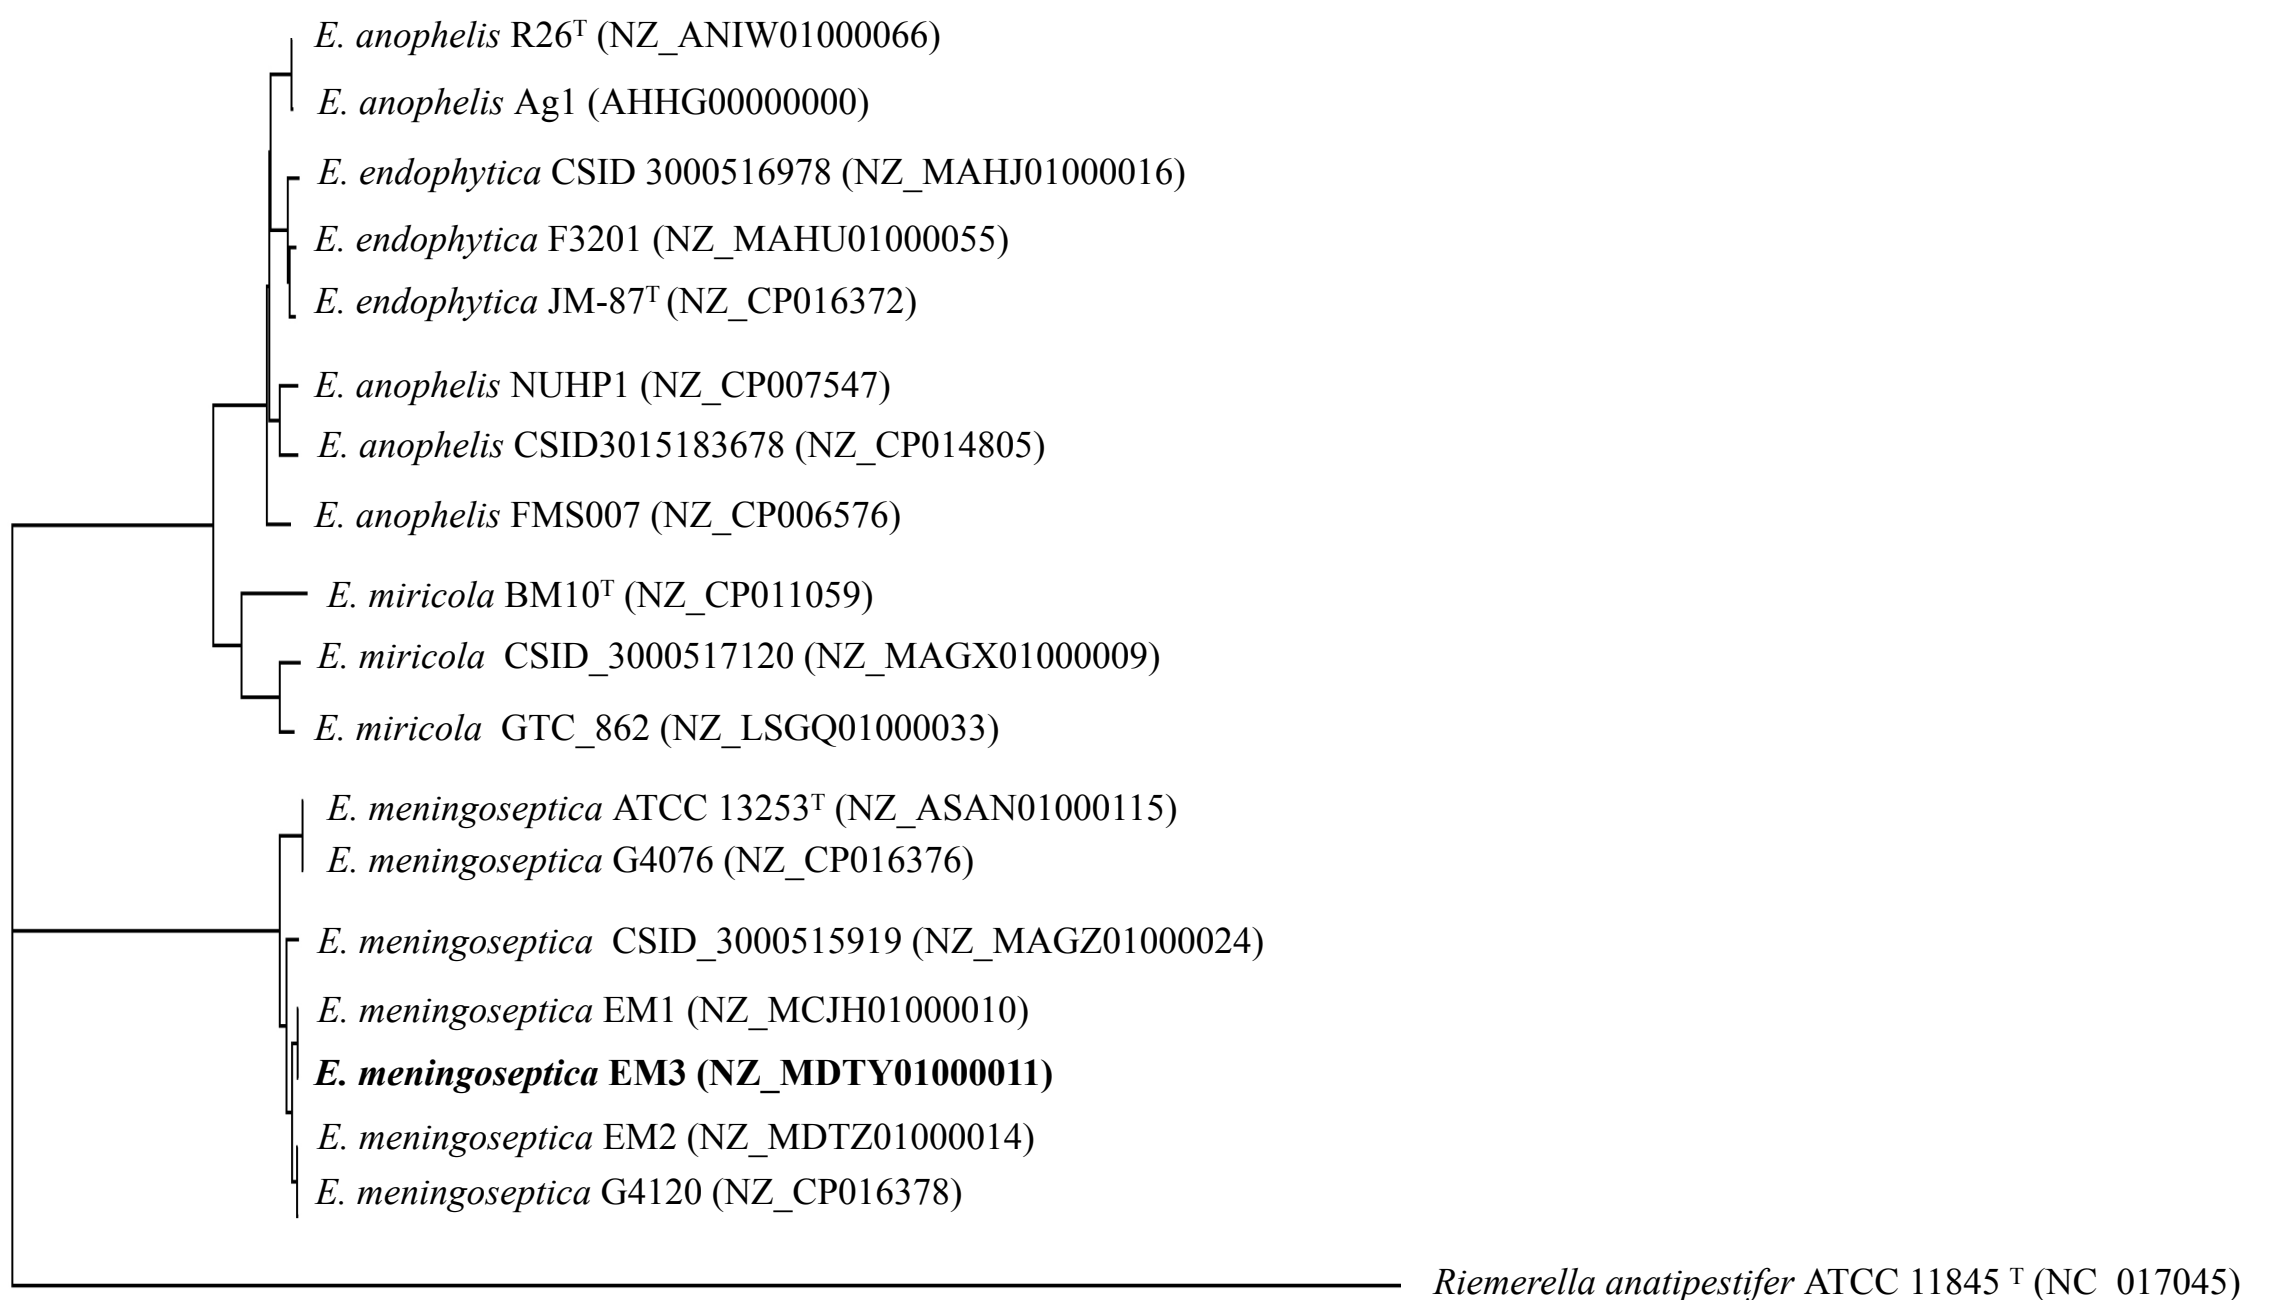

0.01
